# Supplementary material for: Total Selenium Level and Its Distribution between Organs in Beef Cattle in Different Selenium Status
Source: MDPI journal article supplement (doi:10.3390/ani13243885), 2023-12-18
Supplement: s1 [file s1]

Table S1. Correlation between analysed tissues of animals with normal Se status using Pearson R Correlation

| Tissue                  | Serum | The longest back muscle | Semitendegen muscle | Kidney | Lungs  | Heart  | Spleen | Liver  |
|-------------------------|-------|-------------------------|---------------------|--------|--------|--------|--------|--------|
| Serum                   |       | -0.438                  | -0.218              | -0.139 | -0.113 | -0.048 | -0.402 | -0.028 |
| The longest back muscle | *     |                         | 0.490               | 0.249  | 0.210  | 0.121  | 0.349  | 0.235  |
| Semitendegen muscle     |       | *                       |                     | 0.148  | 0.260  | -0.269 | 0.121  | 0.241  |
| Kidney                  |       |                         |                     |        | 0.080  | 0.012  | 0.331  | 0.409  |
| Lungs                   |       |                         |                     |        |        | 0.146  | 0.197  | 0.175  |
| Heart                   |       |                         |                     |        |        |        | 0.336  | -0.333 |
| Spleen                  | *     |                         |                     |        |        |        |        | 0.334  |
| Liver                   |       |                         |                     | *      |        |        |        |        |

\* - Correlation statistically significant differences at  $p < 0.05$  between organ.

Table S2. Correlation between analysed tissues of animals with deficient Se status using Pearson R Correlation

| Tissue                  | Serum | The longest back muscle | Semitendegen muscle | Kidney | Lungs | Heart | Spleen | Liver |
|-------------------------|-------|-------------------------|---------------------|--------|-------|-------|--------|-------|
| Serum                   |       | 0.601                   | 0.615               | 0.561  | 0.597 | 0.573 | 0.451  | 0.458 |
| The longest back muscle |       |                         | 0.437               | 0.341  | 0.489 | 0.345 | 0.260  | 0.179 |
| Semitendegen muscle     |       |                         |                     | 0.039  | 0.419 | 0.381 | 0.211  | 0.277 |
| Kidney                  |       |                         |                     |        | 0.378 | 0.432 | 0.338  | 0.509 |
| Lungs                   |       |                         |                     |        |       | 0.838 | 0.450  | 0.756 |
| Heart                   |       |                         |                     |        |       |       | 0.512  | 0.820 |
| Spleen                  |       |                         |                     |        |       |       |        | 0.459 |
| Liver                   |       |                         |                     |        |       |       |        |       |

\* - Correlation statistically significant differences at  $p < 0.05$  between organ.

Table S3. Correlation between analysed tissues of cow with normal Se status using Pearson R Correlation

| Tissue                  | Serum | The longest back muscle | Semitendegen muscle | Kidney | Lungs | Heart | Spleen | Liver |
|-------------------------|-------|-------------------------|---------------------|--------|-------|-------|--------|-------|
| Serum                   |       | 0.285                   | 0.652               | 0.450  | 0.615 | 0.493 | 0.112  | 0.404 |
| The longest back muscle |       |                         | 0.600               | -0.064 | 0.222 | 0.288 | 0.451  | 0.618 |
| Semitendegen muscle     | *     | *                       |                     | 0.300  | 0.679 | 0.365 | 0.505  | 0.657 |
| Kidney                  | *     |                         |                     |        | 0.413 | 0.268 | 0.294  | 0.187 |
| Lungs                   | *     |                         | *                   |        |       | 0.536 | 0.447  | 0.640 |
| Heart                   | *     |                         |                     |        | *     |       | 0.510  | 0.314 |
| Spleen                  |       | *                       | *                   |        | *     | *     |        | 0.413 |
| Liver                   |       | *                       | *                   |        | *     |       |        |       |

\* - Correlation statistically significant differences at  $p < 0.05$  between organ.

Table S4. Correlation between analysed tissues of cow with deficient Se status using Pearson R Correlation

| Tissue                  | Serum | The longest back muscle | Semitendegen muscle | Kidney | Lungs | Heart | Spleen | Liver |
|-------------------------|-------|-------------------------|---------------------|--------|-------|-------|--------|-------|
| Serum                   |       | 0.270                   | 0.706               | 0.339  | 0.519 | 0.671 | 0.385  | 0.377 |
| The longest back muscle |       |                         | 0.650               | -0.209 | 0.726 | 0.698 | 0.685  | 0.774 |
| Semitendegen muscle     | *     |                         |                     | 0.107  | 0.764 | 0.911 | 0.754  | 0.762 |
| Kidney                  |       |                         |                     |        | 0.031 | 0.141 | 0.228  | 0.162 |
| Lungs                   |       | *                       | *                   |        |       | 0.945 | 0.848  | 0.829 |
| Heart                   | *     | *                       | *                   |        | *     |       | 0.866  | 0.851 |
| Spleen                  |       | *                       | *                   |        | *     | *     |        | 0.843 |
| Liver                   |       | *                       | *                   |        | *     | *     | *      |       |

\* - Correlation statistically significant differences at  $p < 0.05$  between organ.

Table S5. Correlation between analysed tissues of bulls with normal Se status using Pearson R Correlation

| Tissue                  | Serum | The longest back muscle | Semitendegen muscle | Kidney | Lungs  | Heart  | Spleen | Liver  |
|-------------------------|-------|-------------------------|---------------------|--------|--------|--------|--------|--------|
| Serum                   |       | -0.388                  | -0.212              | -0.133 | -0.239 | -0.287 | -0.733 | -0.040 |
| The longest back muscle |       |                         | 0.682               | 0.580  | 0.319  | 0.572  | 0.287  | -0.079 |
| Semitendegen muscle     |       | *                       |                     | 0.311  | 0.329  | 0.307  | 0.091  | 0.048  |
| Kidney                  |       | *                       |                     |        | 0.016  | 0.425  | 0.274  | 0.002  |
| Lungs                   |       |                         |                     |        |        | 0.349  | -0.013 | -0.182 |
| Heart                   |       | *                       |                     |        |        |        | 0.146  | -0.452 |
| Spleen                  | *     |                         |                     |        |        |        |        | 0.476  |
| Liver                   |       |                         |                     |        |        |        |        |        |

\* - Correlation statistically significant differences at  $p < 0.05$  between organ.

Table S6. Correlation between analysed tissues of bulls with deficient Se status using Pearson R Correlation

| Tissue                  | Serum | The longest back muscle | Semitendegen muscle | Kidney | Lungs | Heart | Spleen | Liver |
|-------------------------|-------|-------------------------|---------------------|--------|-------|-------|--------|-------|
| Serum                   |       | 0.723                   | 0.756               | 0.599  | 0.825 | 0.932 | 0.436  | 0.914 |
| The longest back muscle |       |                         | 0.602               | 0.624  | 0.899 | 0.810 | 0.423  | 0.768 |
| Semitendegen muscle     | *     |                         |                     | 0.376  | 0.551 | 0.812 | 0.032  | 0.833 |
| Kidney                  |       |                         |                     |        | 0.546 | 0.657 | 0.386  | 0.662 |
| Lungs                   | *     | *                       |                     |        |       | 0.894 | 0.326  | 0.689 |

|        |   |   |   |   |       |       |
|--------|---|---|---|---|-------|-------|
| Heart  | * | * | * | * | 0.209 | 0.851 |
| Spleen |   |   |   |   |       | 0.498 |
| Liver  | * | * | * |   | *     |       |

\* - Correlation statistically significant differences at  $p < 0.05$  between organ.

Table S7. Correlation between analysed tissues of heifers with normal Se status using Pearson R Correlation

| Tissue                  | Serum | The longest back muscle | Semitendegen muscle | Kidney | Lungs  | Heart  | Spleen | Liver |
|-------------------------|-------|-------------------------|---------------------|--------|--------|--------|--------|-------|
| Serum                   |       | 0.134                   | 0.169               | -0.341 | -0.386 | -0.257 | -0.378 | 0.049 |
| The longest back muscle |       |                         | 0.405               | 0.351  | 0.667  | 0.566  | 0.597  | 0.505 |
| Semitendegen muscle     |       |                         |                     | 0.014  | 0.168  | -0.042 | 0.313  | 0.192 |
| Kidney                  |       |                         |                     |        | 0.713  | 0.648  | 0.668  | 0.276 |
| Lungs                   |       |                         |                     |        |        | 0.948  | 0.975  | 0.740 |
| Heart                   |       |                         |                     |        | *      |        | 0.911  | 0.839 |
| Spleen                  |       |                         |                     |        | *      | *      |        | 0.783 |
| Liver                   |       |                         |                     |        |        | *      | *      |       |

\* - Correlation statistically significant differences at  $p < 0.05$  between organ.

Table S8. Correlation between analysed tissues of heifers with deficient Se status using Pearson R Correlation

| Tissue                  | Serum | The longest back muscle | Semitendegen muscle | Kidney | Lungs | Heart  | Spleen | Liver  |
|-------------------------|-------|-------------------------|---------------------|--------|-------|--------|--------|--------|
| Serum                   |       | 0.124                   | 0.591               | 0.442  | 0.403 | 0.529  | 0.553  | 0.381  |
| The longest back muscle |       |                         | 0.165               | 0.207  | 0.478 | 0.211  | 0.462  | -0.066 |
| Semitendegen muscle     |       |                         |                     | 0.549  | 0.129 | -0.050 | 0.234  | 0.043  |
| Kidney                  |       |                         |                     |        | 0.624 | 0.035  | 0.621  | 0.272  |
| Lungs                   |       |                         |                     |        |       | 0.563  | 0.666  | 0.718  |
| Heart                   |       |                         |                     |        |       |        | 0.670  | 0.764  |
| Spleen                  |       |                         |                     |        |       |        |        | 0.494  |
| Liver                   |       |                         |                     |        |       | *      | *      |        |

\* - Correlation statistically significant differences at  $p < 0.05$  between organ.
